# Supplementary material
Source: PubMed Central journal article supplement (PMC5582850)
Supplement: 10.1074_M117.774893_jbc.M117.774893-1.pdf [file 10.1074_M117.774893_jbc.M117.774893-1.pdf]

Supporting Information to the manuscript:

**Key aromatic/hydrophobic amino acids controlling a cross-amyloid peptide interaction versus amyloid self-assembly**

Maria Bakou, Kathleen Hille, Michael Kracklauer, Anna Spanopoulou, Christina V. Frost, Eleni Malideli, Li-Mei Yan, Andrea Caporale, Martin Zacharias and Aphrodite Kapurniotu

## Table of contents

|                                                                                                                                                                        |           |
|------------------------------------------------------------------------------------------------------------------------------------------------------------------------|-----------|
| <b>Title and authors</b>                                                                                                                                               | S-1       |
| <b>Table of contents</b>                                                                                                                                               | S-2       |
| <b>Supporting Tables</b>                                                                                                                                               |           |
| <b>Supporting Table 1:</b> Average RMSD and SASA values from MD simulation.                                                                                            | S-3       |
| <b>Supporting Figures</b>                                                                                                                                              | S-4 – S-9 |
| <b>Supporting Figure S1.</b> Determination of app. $K_{d,s}$ of interactions of IAPP and selected mutants with A $\beta$ 42 via fluorescence spectroscopic titrations. | S-4       |
| <b>Supporting Figure S2.</b> Determination of app. $K_{d,s}$ of interactions of IAPP and selected mutants with IAPP via fluorescence spectroscopic titrations.         | S-5       |
| <b>Supporting Figure S3.</b> Pull-down assays of Biotin-4A-A $\beta$ 42 and Biotin-IAPP-A $\beta$ 42 hetero-assemblies.                                                | S-6       |
| <b>Supporting Figure S4.</b> Effects of IAPP-GI and its Ala mutants on amyloidogenesis of A $\beta$ 40, A $\beta$ 42 and IAPP.                                         | S-7       |
| <b>Supporting Figure S5.</b> Solubilities of A15,23 and single Ala mutants at 50 and 20 $\mu$ M, respectively (aq. buffer, pH 7.4).                                    | S-8       |
| <b>Supporting Figure S6.</b> Calculated secondary structure contents of IAPP and its mutants at peptide concentrations 5-50 $\mu$ M via deconvolutions of CD spectra.  | S-9       |

## Supporting Tables

**Supporting Table 1.** Mean value ( $\pm$ SD) of C $\alpha$ -atom root-mean-square deviation (RMSD) and solvent-accessible surface area (SASA) calculated from MD simulation (3  $\mu$ s).

| <b>IAPP &amp; mutants</b> | <b>C<math>\alpha</math>-RMSD (<math>\text{\AA}</math>)</b> | <b>SASA (<math>\text{\AA}^2</math>)</b> |
|---------------------------|------------------------------------------------------------|-----------------------------------------|
| IAPP                      | 1.31 ( $\pm$ 0.1)                                          | 205 ( $\pm$ 57)                         |
| A23                       | 1.13 ( $\pm$ 0.1)                                          | 318 ( $\pm$ 103)                        |
| A26                       | 1.44 ( $\pm$ 0.2)                                          | 159 ( $\pm$ 73)                         |
| A15,23                    | 1.15 ( $\pm$ 0.1)                                          | 282 ( $\pm$ 87)                         |
| 4A                        | 2.68 ( $\pm$ 0.2)                                          | 568 ( $\pm$ 145)                        |

## Supporting Figures

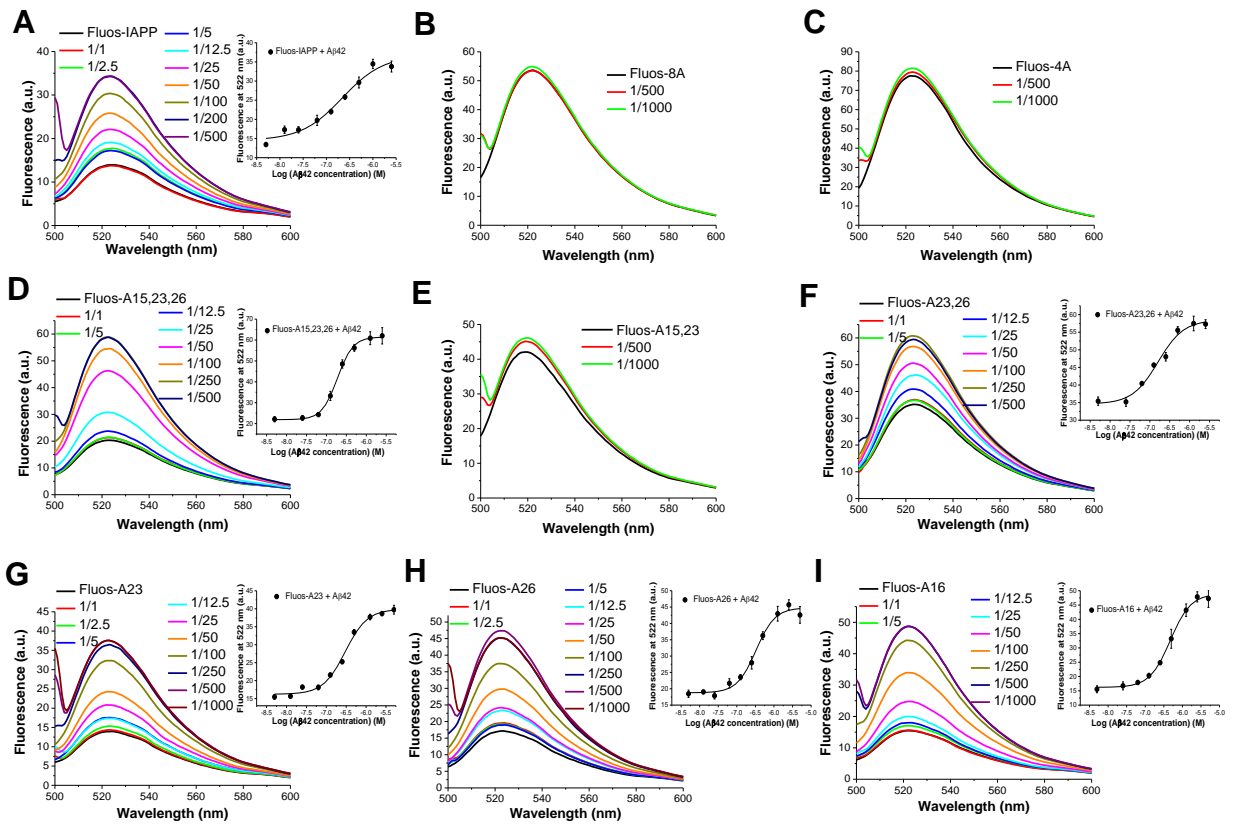

**Supporting Figure S1.** Determination of app.  $K_{d}$ s of interactions of IAPP and selected Ala mutants (5 nM) with Aβ42 by fluorescence spectroscopic titrations. Fluorescence emission spectra of N<sup>α</sup>-terminal fluorescein-labeled IAPP or mutants (Fluos-peptide) alone and after titration with Aβ42 (Fluos-peptide/Aβ42 as indicated) are shown for the following peptides: (A) IAPP; (B) 8A; (C) 4A; (D) A15,23,26; (E) A15,23; (F) A23,26; (G) A23; (H) A26; (I) A16. In the insets, the binding curves are shown; data are means ( $\pm$ SD) from three binding curves. Calculated app.  $K_{d}$ s are in Table 2.

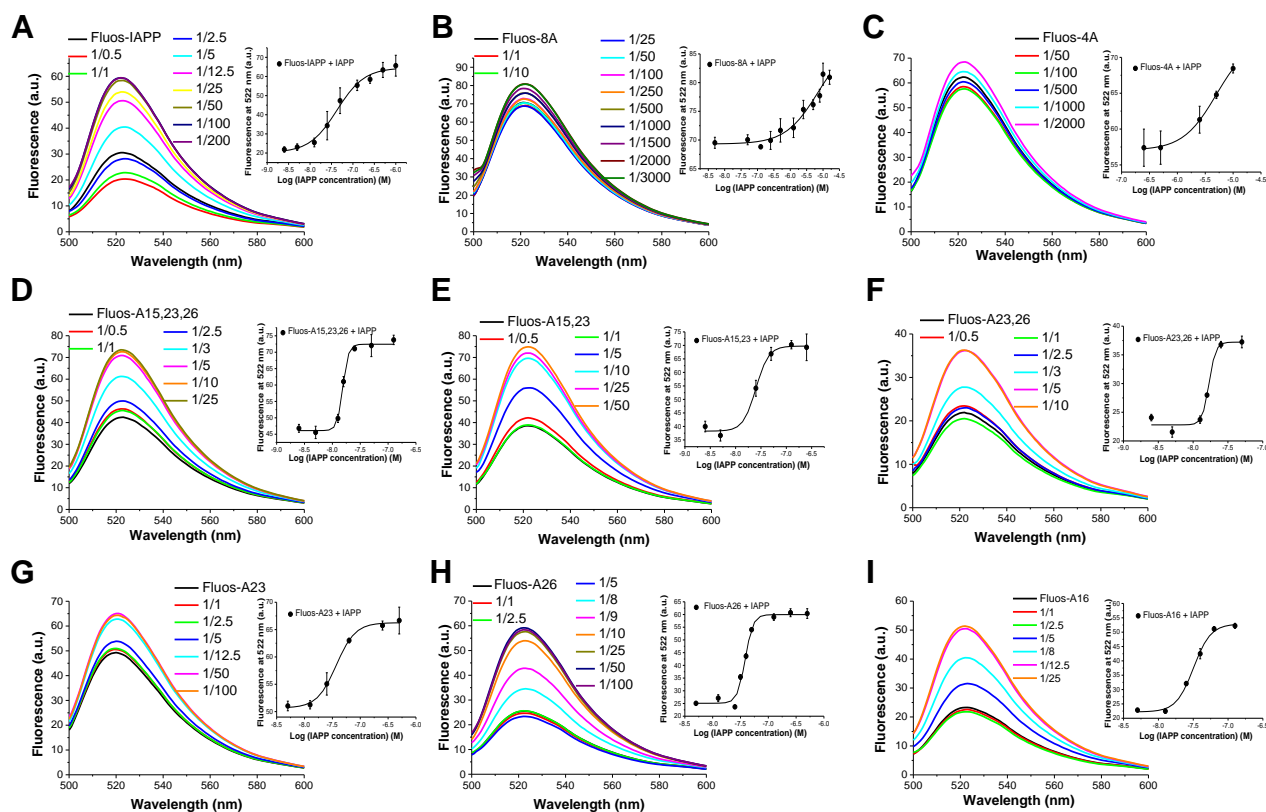

**Supporting Figure S2.** Determination of app.  $K_{d}$ s of interactions of IAPP and selected Ala mutants (5 nM) with IAPP by fluorescence spectroscopic titrations. Fluorescence emission spectra of N<sup>α</sup>-terminal fluorescein-labeled IAPP or mutants (Fluos-peptide) alone and after titration with IAPP ((molar ratios Fluos-peptide/IAPP as indicated)) are shown for the following peptides: **(A)** IAPP; **(B)** 8A; **(C)** 4A; **(D)** A15,23,26; **(E)** A15,23; **(F)** A23,26; **(G)** A23; **(H)** A26; **(I)** A16. In the insets, the binding curves are shown; data are means ( $\pm$ SD) from three binding curves. Calculated app.  $K_{d}$ s are in Table 2.

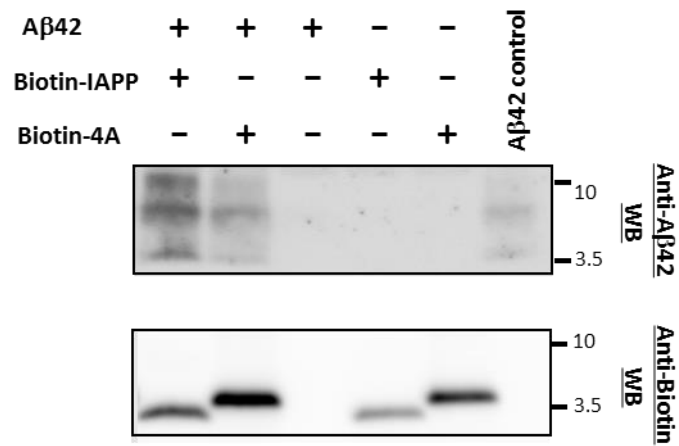

**Supporting Figure S3.** Pull-down assay of Biotin-4A- and Biotin-IAPP-A $\beta$ 42 hetero-assemblies. Top: Anti-A $\beta$ 42 Western blot (WB) analysis of a mixture of A $\beta$ 42 (5  $\mu$ M) + Biotin-IAPP (2.5  $\mu$ M), a mixture of A $\beta$ 42 (5  $\mu$ M) + Biotin-4A (2.5  $\mu$ M), A $\beta$ 42 (5  $\mu$ M) alone, and Biotin-IAPP or Biotin-4A (2.5  $\mu$ M) alone as indicated following biotin pull-down and peptide dissociation from beads. Lane “A $\beta$ 42 control”, A $\beta$ 42 not incubated with beads. Bottom: Anti-Biotin WB of same incubations as in upper panel. Results shown are representative of 3 assays.

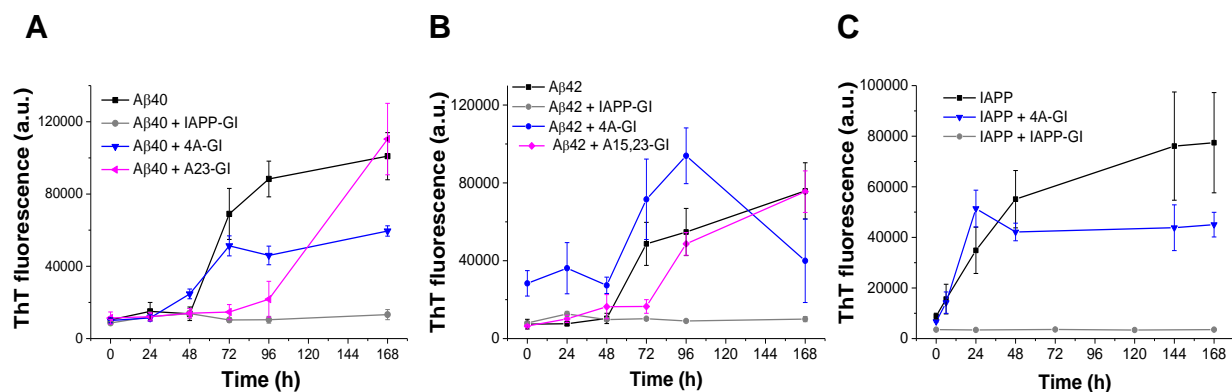

**Supporting Figure S4.** Effects of IAPP-GI and its Ala mutants on amyloidogenesis of A $\beta$ 40, A $\beta$ 42 and IAPP. **(A)** Effects on A $\beta$ 40 fibrillogenesis. Fibrillogenesis of A $\beta$ 40 (16.5  $\mu$ M) alone or with IAPP-GI, 4A-GI or A23-GI (1/1) were determined by the ThT binding assay. **(B)** Effects on A $\beta$ 42 fibrillogenesis. Fibrillogenesis of A $\beta$ 42 (16.5  $\mu$ M) alone or with IAPP-GI, 4A-GI or A15,23-GI (1/1) were determined by the ThT binding assay. **(C)** Effects on amyloidogenesis of IAPP. Fibrillogenesis of IAPP (12  $\mu$ M) alone or with IAPP-GI or 4A-GI (1/1) was followed by the ThT binding assay. All data shown in **(A-C)** are means ( $\pm$ SD) from 3 assays.

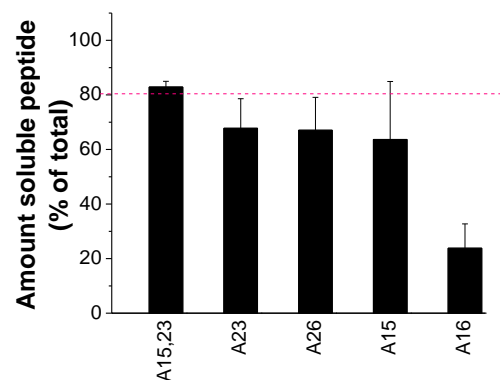

**Supporting Figure S5.** Solubilities of A15,23 and single Ala mutants at 50 and 20  $\mu\text{M}$ , respectively (aq. buffer, pH 7.4). Mutants were incubated for 7 days and solubilities were determined by a sedimentation assay (means ( $\pm\text{SD}$ ), 3 assays). Peptide amounts (% of total) in supernatants at 7 days of incubation are shown; a mutant is judged as soluble when  $\geq 80\%$  is found in supernatant (indicated by a dotted red line).



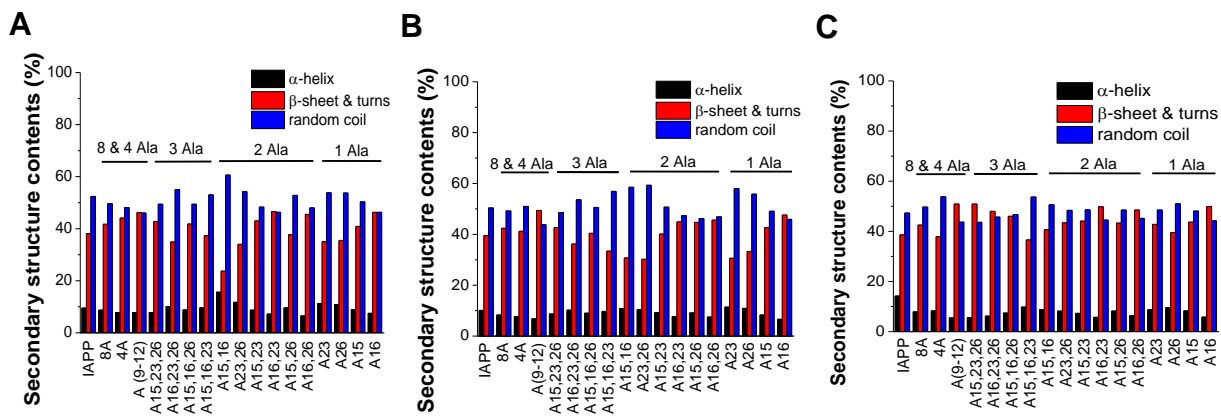

**Supporting Figure S6.** Calculated secondary structure contents of IAPP and mutants via deconvolutions of CD spectra at peptide concentrations of 5  $\mu\text{M}$  (**A**), 10  $\mu\text{M}$  (**B**) and 50  $\mu\text{M}$  (**C**).
